# Supplementary material for: In situ SERS detection of multi-class insecticides on plant surfaces
Source: Royal Society of Chemistry journal article supplement (doi:10.1039/c5ay01058f), 2015-01-01
Supplement: c5ay01058f1.pdf [file c5ay01058f1.pdf]

## ***In situ* SERS detection of multi-class insecticides on plant surfaces**

Ruyan Hou<sup>a,b</sup>, Shintaro Pang<sup>a</sup>, Lili He<sup>a\*</sup>

<sup>a</sup>Department of Food Science, University of Massachusetts, Amherst, MA, USA.

<sup>b</sup>State Key Laboratory of Tea Plant Biology and Utilization, Anhui Agricultural University, Hefei, 230036, P. R. China

\*Corresponding author: Lili He, E-mail: lilihe@foodsci.umass.edu; Tel: +1 413 545 5847

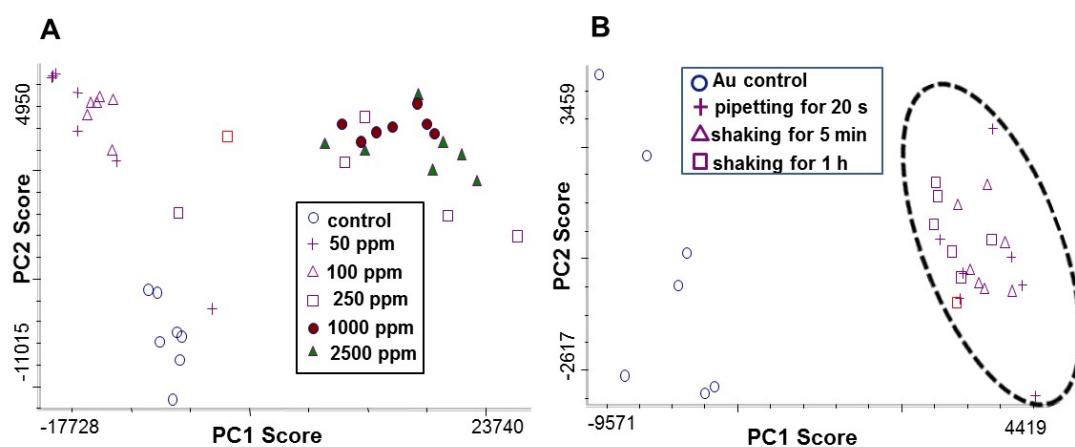

**Figure S1.** PCA analysis of Au NPs with isocarbphos. A. different Au NPs concentration (50-2500 ppm) with 10 ppm of isocarbphos B. different incubation method

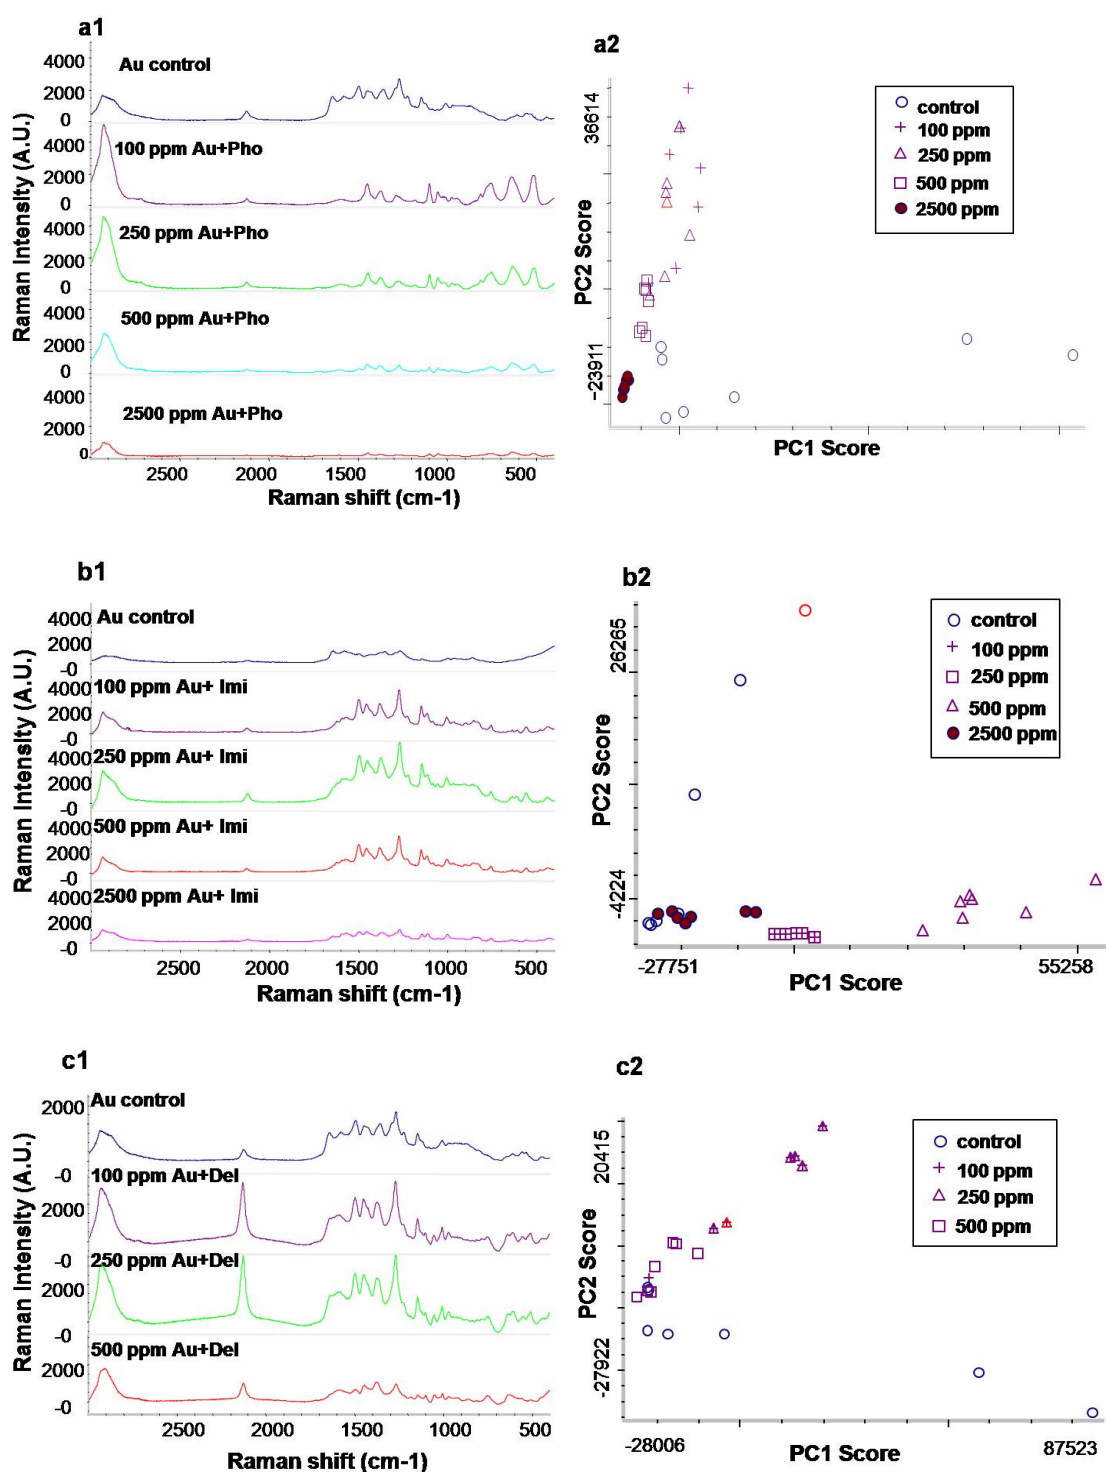

**Fig. S2** Different Au NPs concentration was combined with targets. a, phorate; b, imidacloprid; c, deltamethrin (1.Raman spectrum; 2. PCA plots )

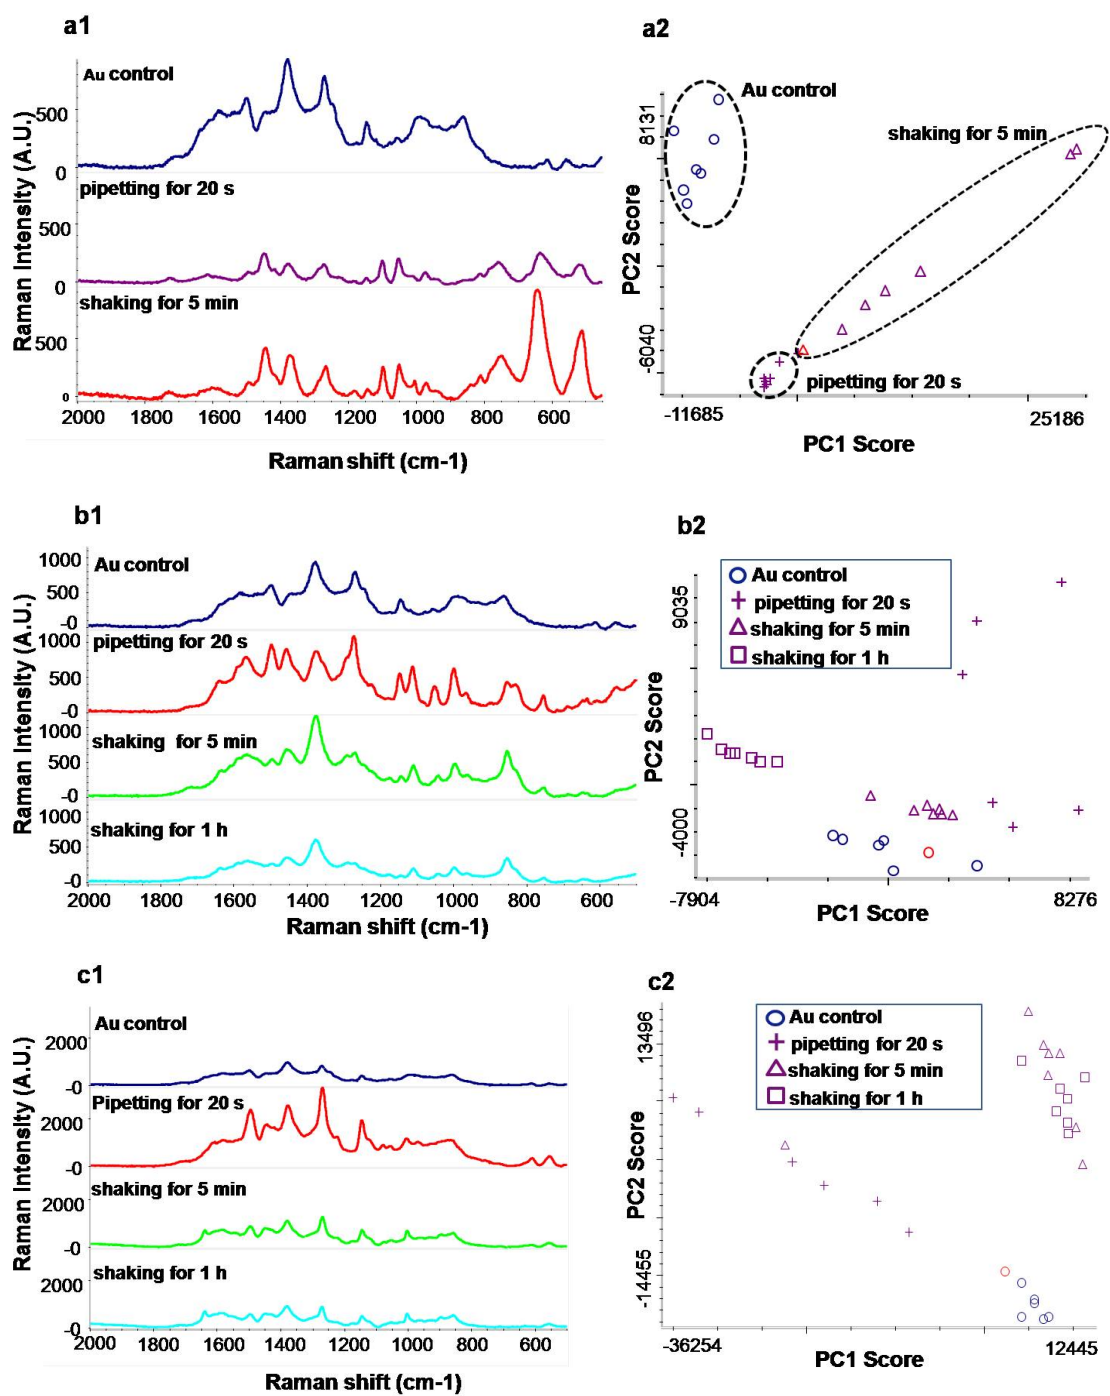

**Fig. S3** Different incubation method and time of Au NPs and targets. a, phorate; b, imidacloprid; c, detlamethrin (1.Raman spectrum; 2. PCA plots)

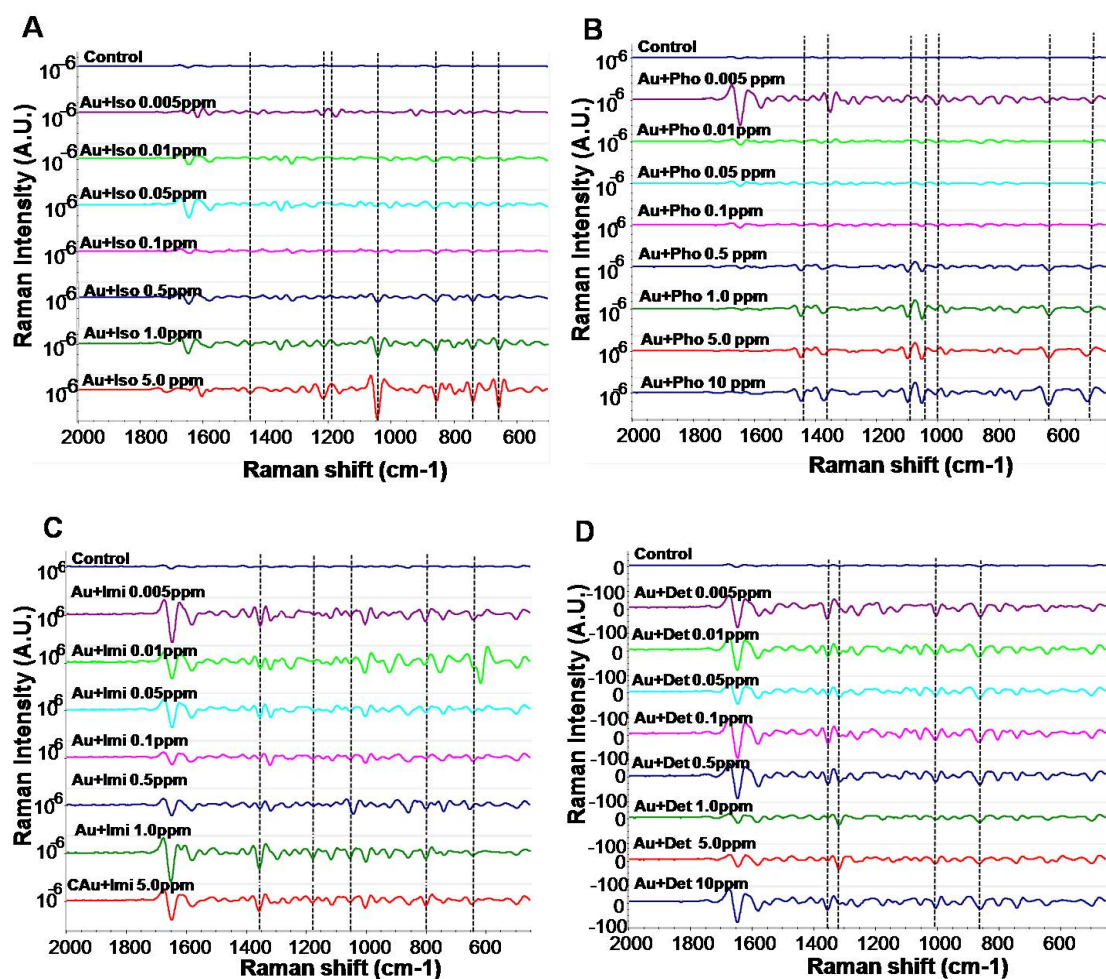

**Fig. S4** Identified peaks and Second derivative Raman spectra of different concentration for four insecticides. A, identified peaks (a1, Iso; a2, Pho; a3, Imi; a4, Det); B, Second derivative Raman spectra (b1, Iso; b2, Pho; b3, Imi; b4, Det)

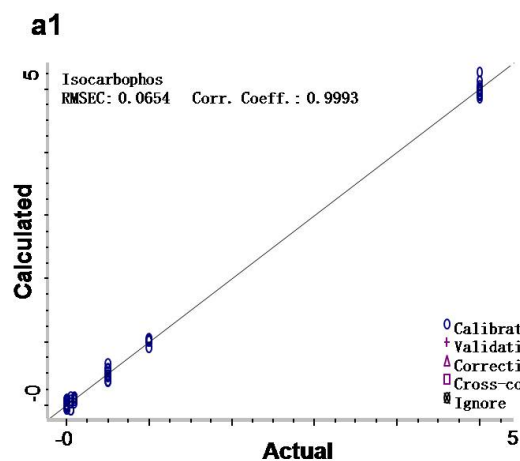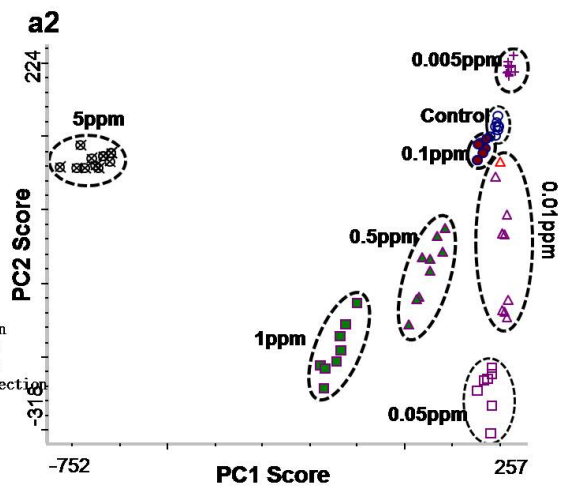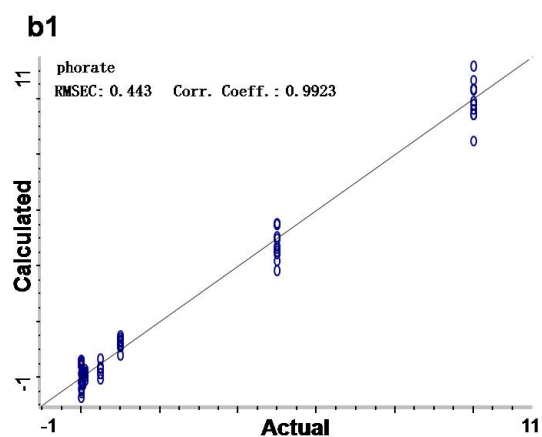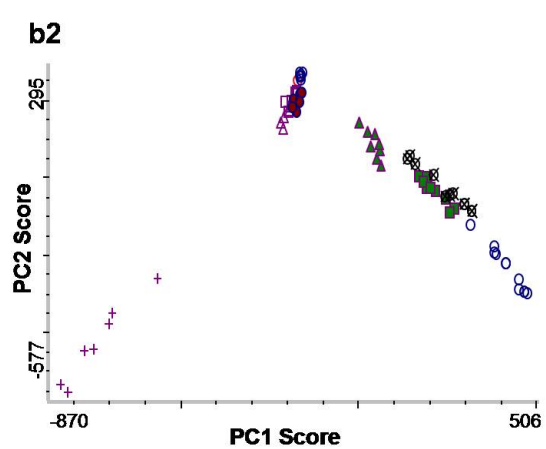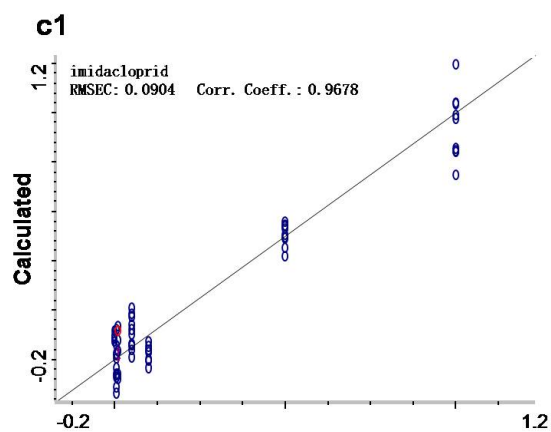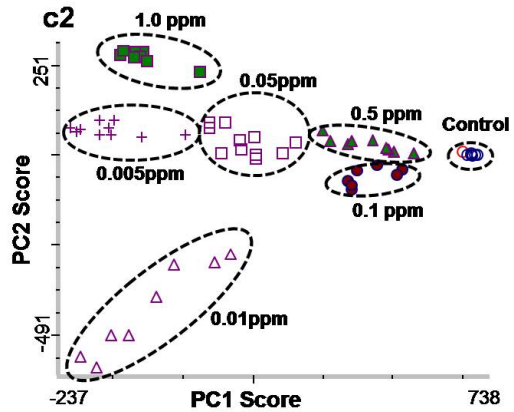

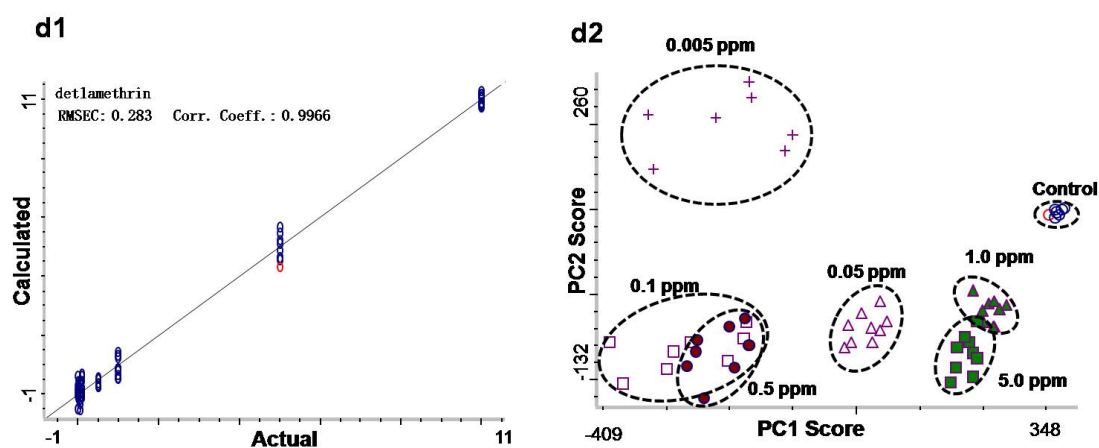

**Fig. S5** PLS and PCA plots of four insecticides (a, Iso; b, Pho; c, Imi; d, Det)

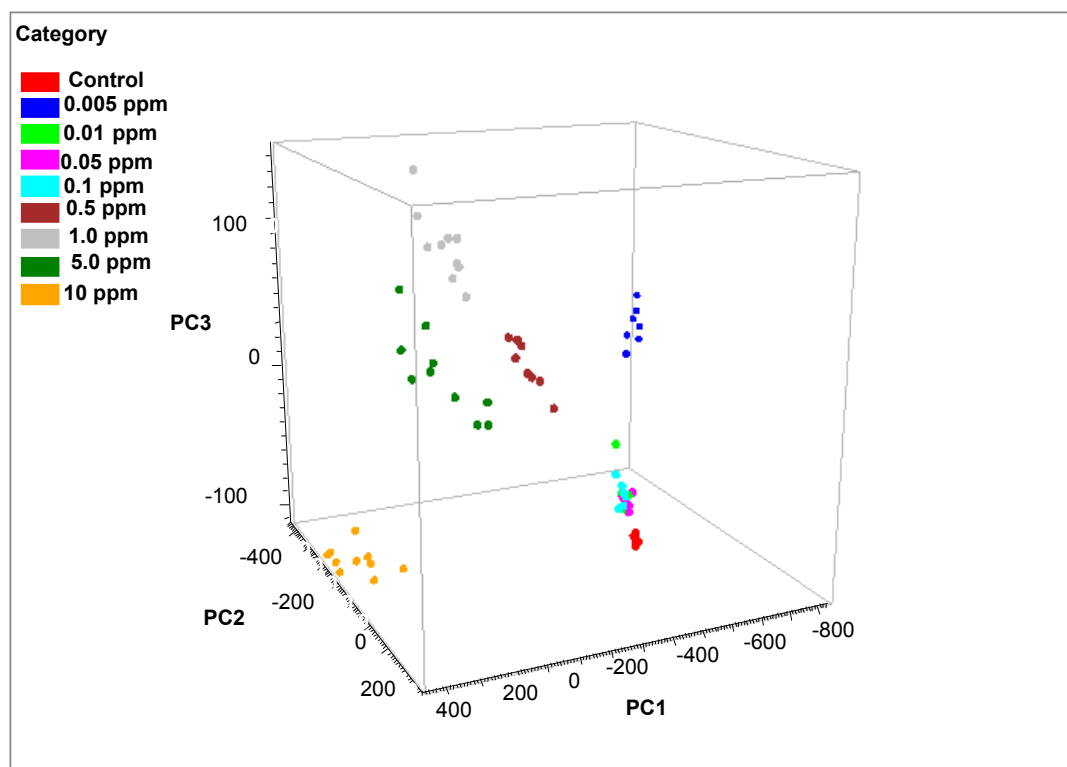

**Fig. S5-b2-1** 3D figure for phorate.

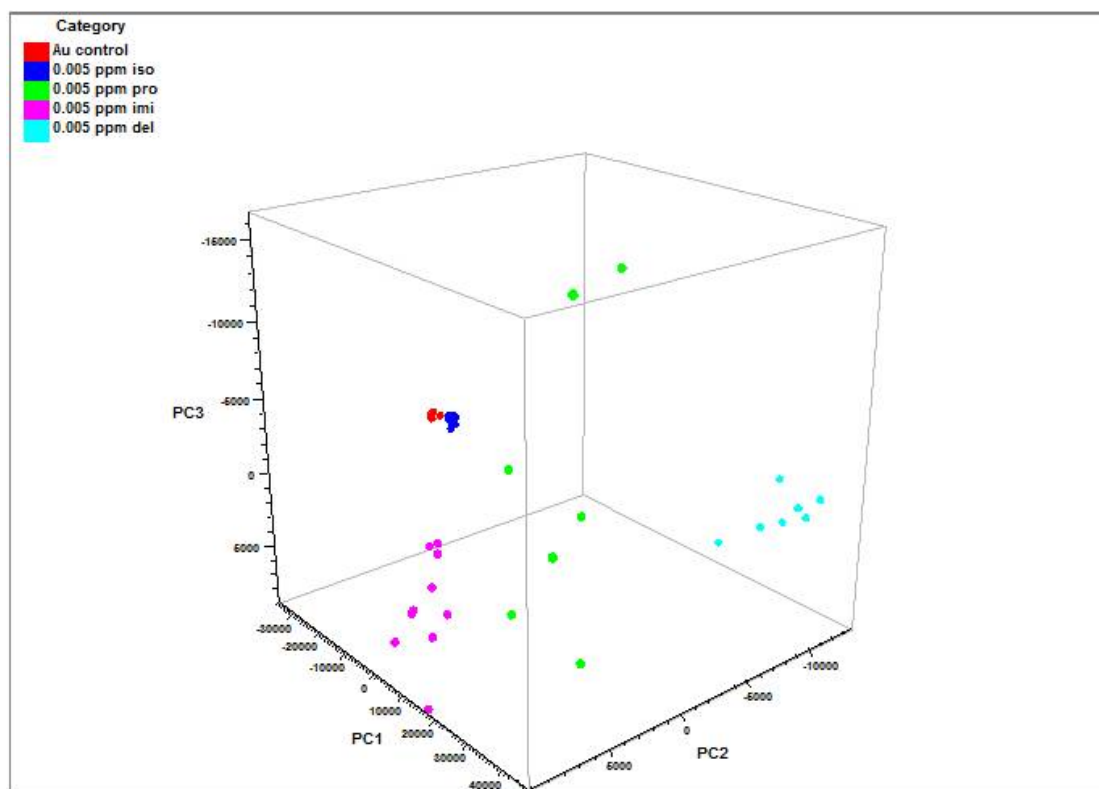

**Fig. S6** LOD of four insecticides with PCA (0.005 ppm showed using 3D Figure)



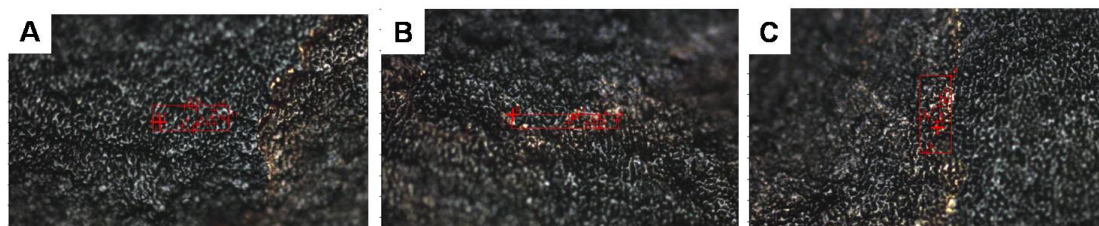

**Fig. S7** Optical images of selected scan point. A, tea leaf no Au NPs; B, tea leaf was dropped Au NPs and then mixed; C, exposed-insecticide tea leaf was dropped with Au NPs and mixed.



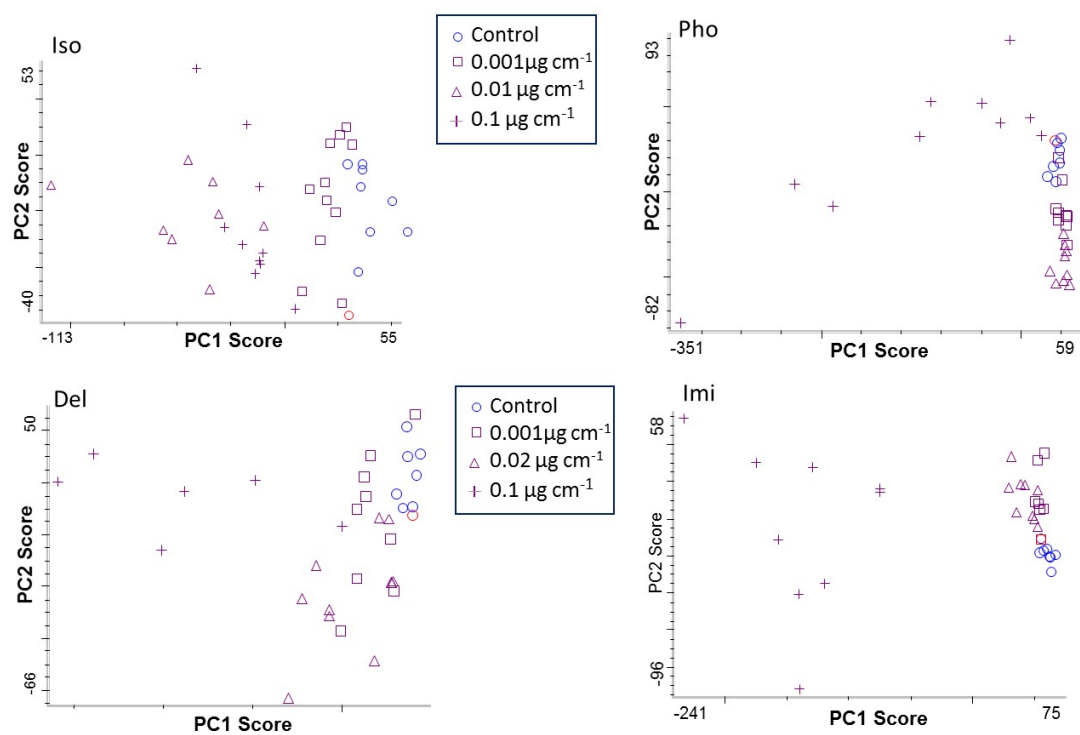

**Fig. S8** LOD of four insecticides on tea leaf with PCA
